# Supplementary figures and images for: Aerosol forcing based on CAM5 and AM3 meteorological fields
Source: Copernicus journal article supplement (doi:10.5194/acp-12-9629-2012), 2012-10-24

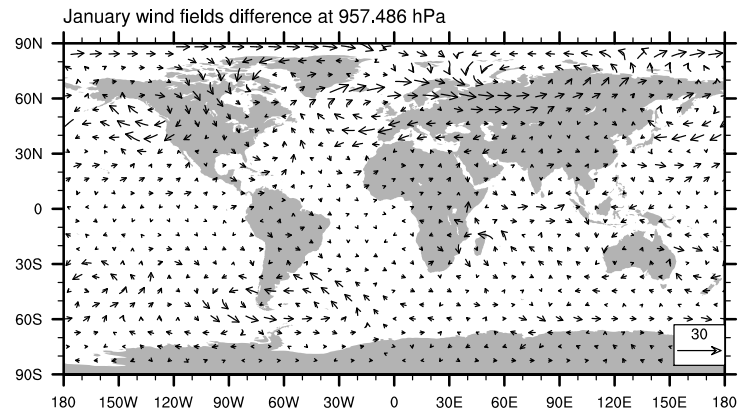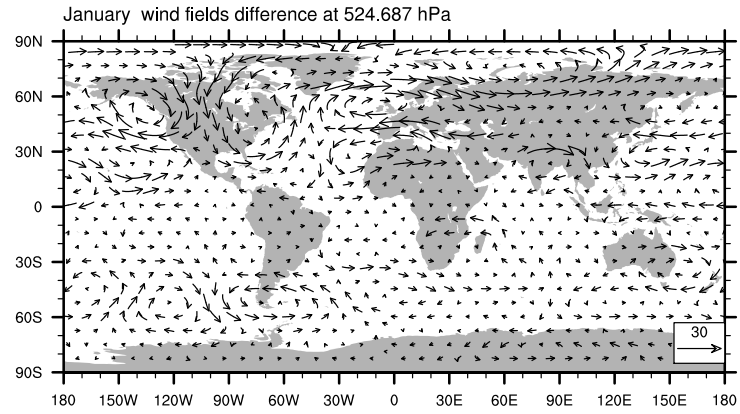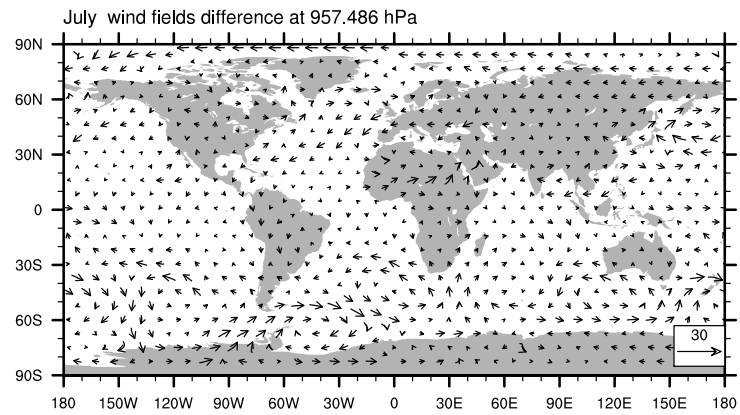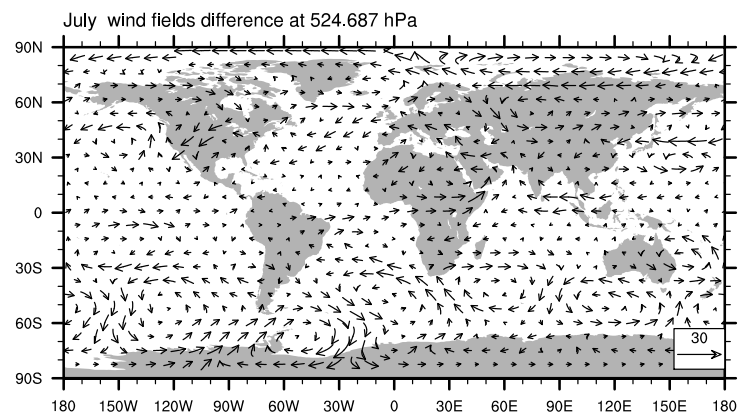

Figure S1 Wind fields differences (CAM5-AM3) in January and July at 957.486 hPa and 524.687 hPa.

Supplement: Supplementary file 1 [file acp-12-9629-2012-supplement.pdf]
